# Supplementary material for: Circular RNA circFIRRE drives osteosarcoma progression and metastasis through tumorigenic-angiogenic coupling
Source: Research Square preprint supplement (doi:10.21203/rs.3.rs-1610775/v1), 2022-05-04
Supplement: Supplementary file 1 [file bc9f920b3d6c651c236efa14.pdf]

| Characteristic                | circFIRRE  |            | P value |
|-------------------------------|------------|------------|---------|
|                               | High       | Low        |         |
| All cases                     | 52         | 52         |         |
| Gender, n (%)                 |            |            | 0.025   |
| Female                        | 13 (12.5%) | 25 (24%)   |         |
| Male                          | 39 (37.5%) | 27 (26%)   |         |
| Age, n (%)                    |            |            | < 0.001 |
| < 16                          | 18 (17.3%) | 42 (40.4%) |         |
| ≥16                           | 34 (32.7%) | 10 (9.6%)  |         |
| Metastatic, n (%)             |            |            | < 0.001 |
| metastatic                    | 30 (28.8%) | 10 (9.6%)  |         |
| non-metastatic                | 22 (21.2%) | 42 (40.4%) |         |
| Histologic response, n (%)    |            |            | 0.752   |
| Stage 1/2 (0-90 % necrosis)   | 25 (30.1%) | 27 (32.5%) |         |
| Stage 3/4 (91-100 % necrosis) | 13 (15.7%) | 18 (21.7%) |         |
| Primary tumor site, n (%)     |            |            | 0.504   |
| Arm/hand                      | 6 (5.8%)   | 5 (4.9%)   |         |
| Leg/foot                      | 43 (41.7%) | 41 (39.8%) |         |
| Other                         | 0 (0%)     | 2 (1.9%)   |         |
| Pelvis                        | 3 (2.9%)   | 2 (1.9%)   |         |
| Skull                         | 0 (0%)     | 1 (1%)     |         |
| Definitive Surgery, n (%)     |            |            | 0.525   |
| Amputation                    | 5 (5.1%)   | 8 (8.2%)   |         |
| Limb sparing                  | 45 (45.9%) | 37 (37.8%) |         |
| No surgery                    | 2 (2%)     | 1 (1%)     |         |
| Vital Status, n (%)           |            |            | < 0.001 |
| Alive                         | 15 (14.4%) | 39 (37.5%) |         |
| Dead                          | 36 (34.6%) | 13 (12.5%) |         |
| Unknown                       | 1 (1%)     | 0 (0%)     |         |
