# Supplementary material for: Circular RNA circFIRRE drives osteosarcoma progression and metastasis through tumorigenic-angiogenic coupling
Source: Research Square preprint supplement (doi:10.21203/rs.3.rs-1610775/v1), 2022-05-04
Supplement: Supplementary file 1 [file c038ec889a7019194a7e8e84.docx]

**Circular RNA circFIRRE drives** **osteosarcoma progression and metastasis through** **tumorigenic-angiogenic coupling**

***Additional file 14***

***Raw data of Western blots and agarose gel electrophoreses***

Lingfeng Yu, Hao Zhu, Zhen Wang, Jianhao Huang, Yan Zhu, Gentao Fan, Yicun Wang, Guangxin Zhou*

Table of contents

Western blots-----------------------------------------------------------------------------------------------2

Agarose gel electrophoreses -----------------------------------------------------------------------------6


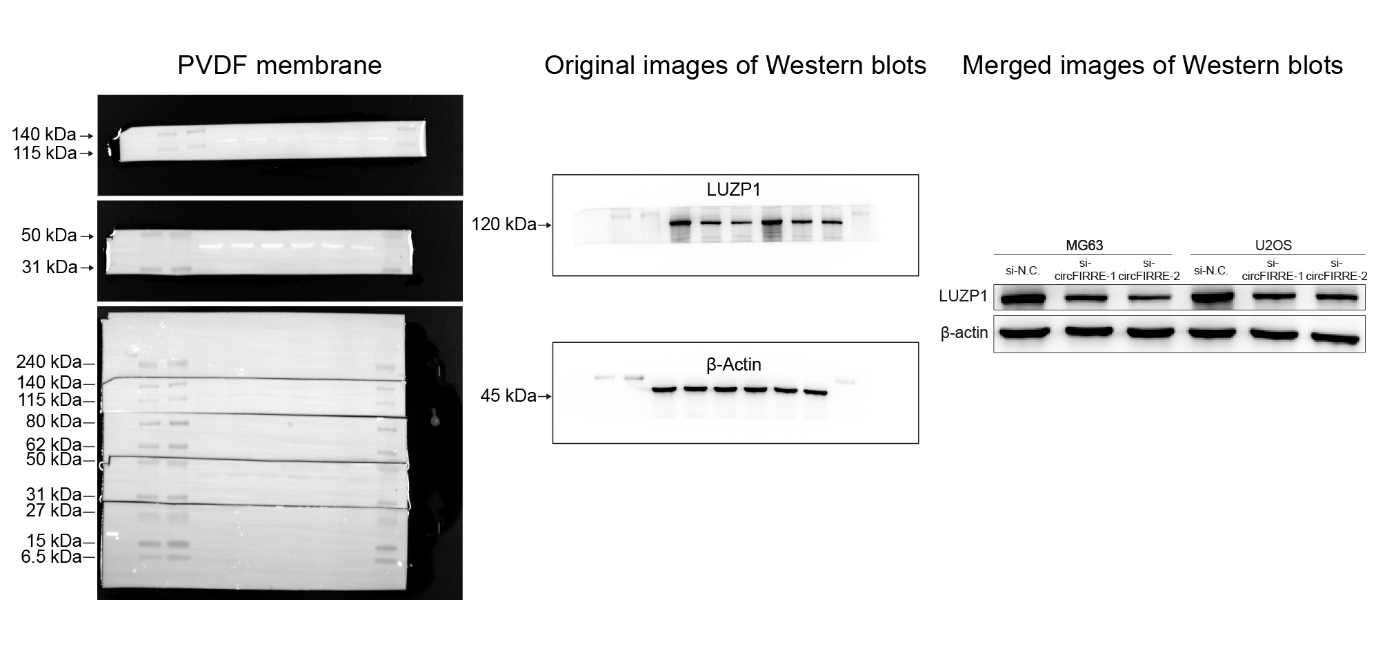


**Figure S9F.** **Western blot analysis of LUZP1 protein level in MG63 and U2OS cells after circFIRRE silencing.** MG63 and U2OS cells were transfected with siRNAs (si-circFIRRE-1 and -2). To analyze the protein level of target gene (LUZP1) and internal control (β-Actin) on the same blot, PVDF membrane was cut according to the protein markers followed by primary antibodies incubation. Specifically, based on the molecular weight of LUZP1 (~120 kDa) and β-Actin (~45 kDa), the bands containing LUZP1 (115-140 kDa) and β-Actin (31-50 kDa) were cut from the PVDF membrane and blotted with anti-LUZP1 and anti-β-Actin antibodies, respectively, and detected with a fluorescent second antibody.


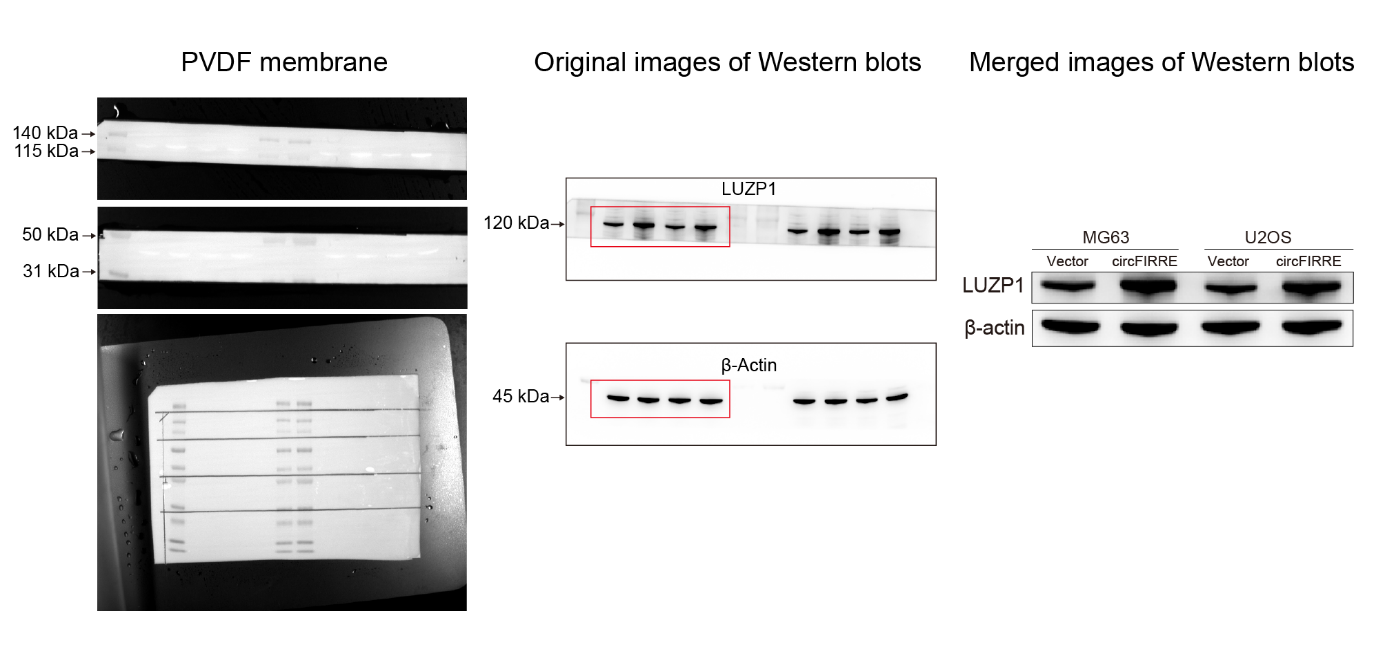


**Figure S9G.** **Western blot analysis of LUZP1 protein level in MG63 and U2OS cells after circFIRRE overexpression.** **Red frame represents** **the components of merged images.**


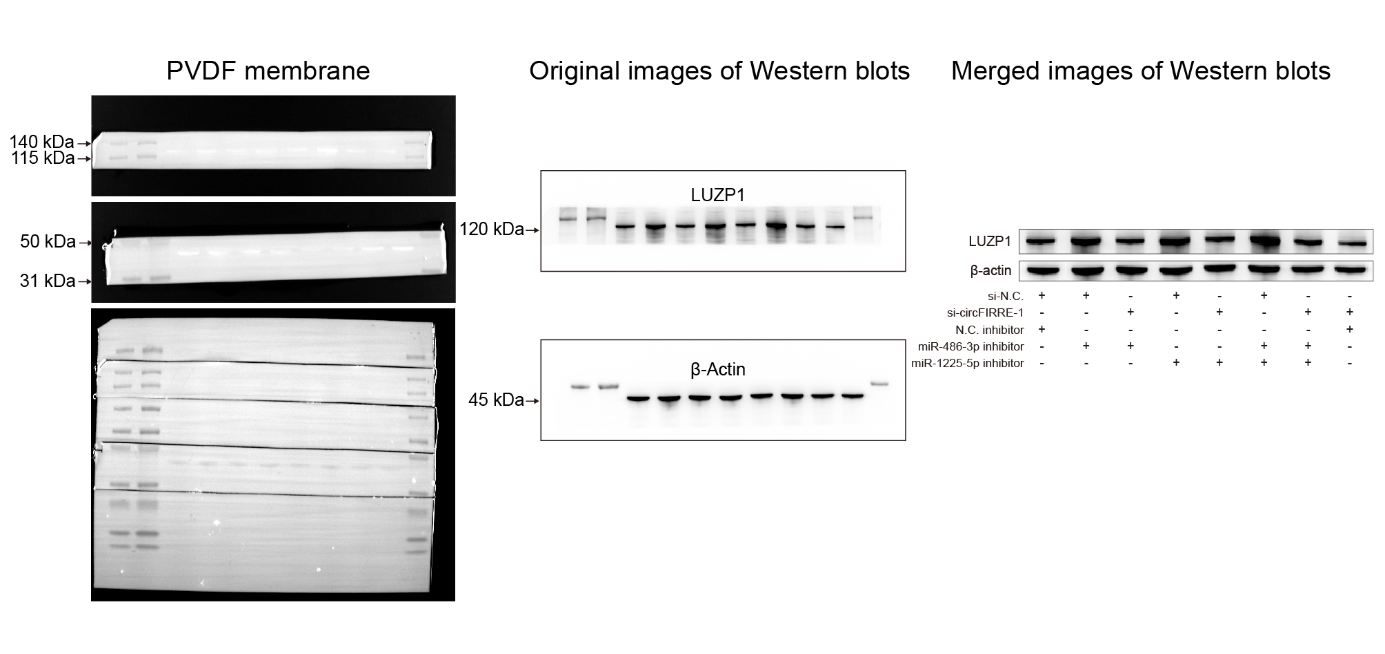


**Figure 7H. Western blot analysis of LUZP1 protein level in MG63 cells under co-transfection with siRNA (si-circFIRRE-1) and (or) miRNA inhibitors (miR-486-3p inhibitor, miR-1225-5p inhibitor).**

**
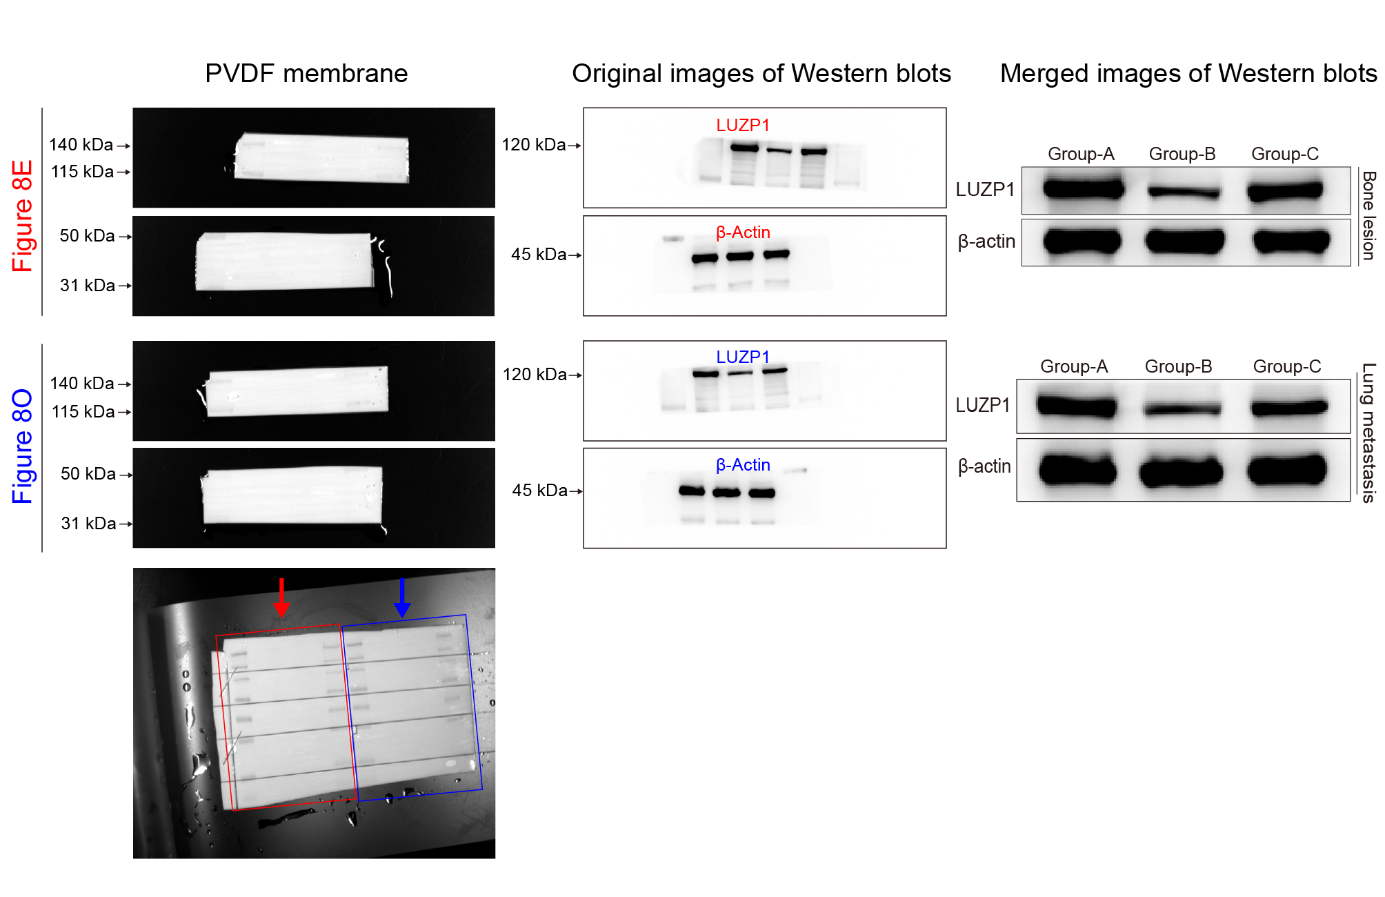
**

**Figure 8. Western blot analysis of LUZP1 protein level in primary OS lesions and OS lung metastatic lesions. Red frame represents the primary OS lesions in Figure 8E; blue frame represents the OS lung metastatic lesions in Figure 8O.**

**
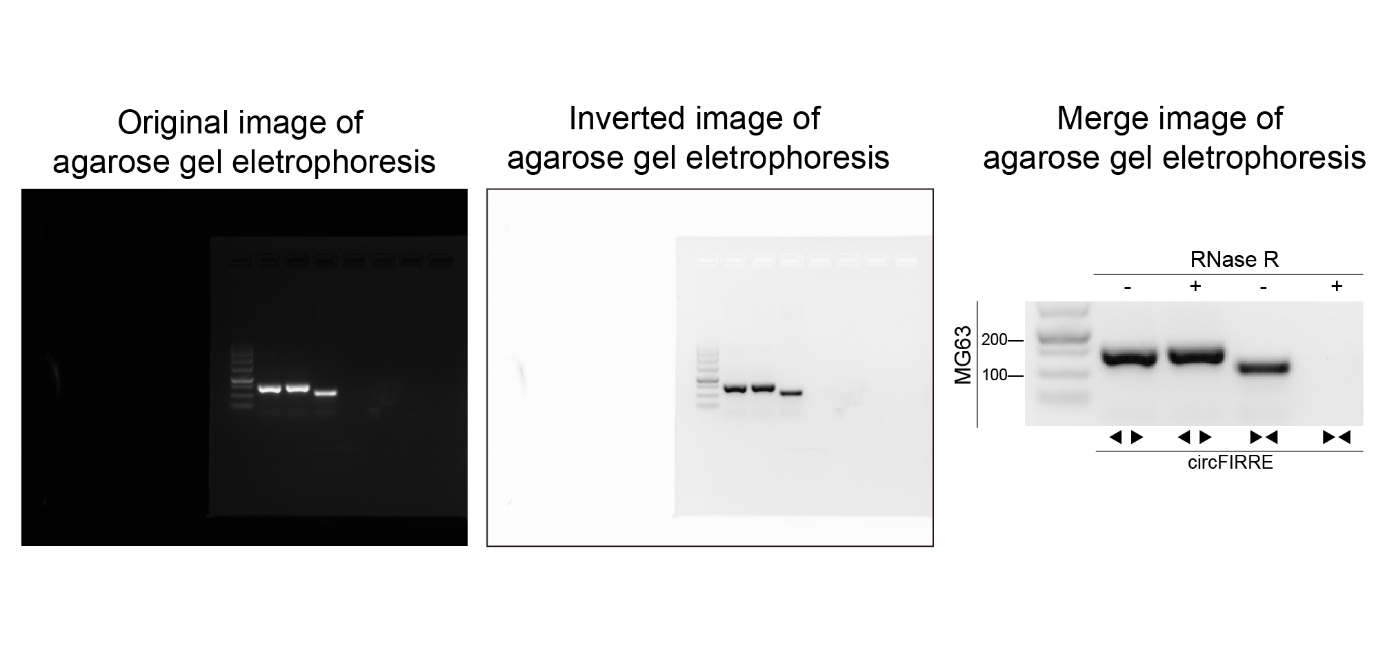
**

**Figure 1L.** **Agarose gel electrophoresis analysis of circFIRRE and linear FIRRE in MG63 cells after RNase R treatment.**

**
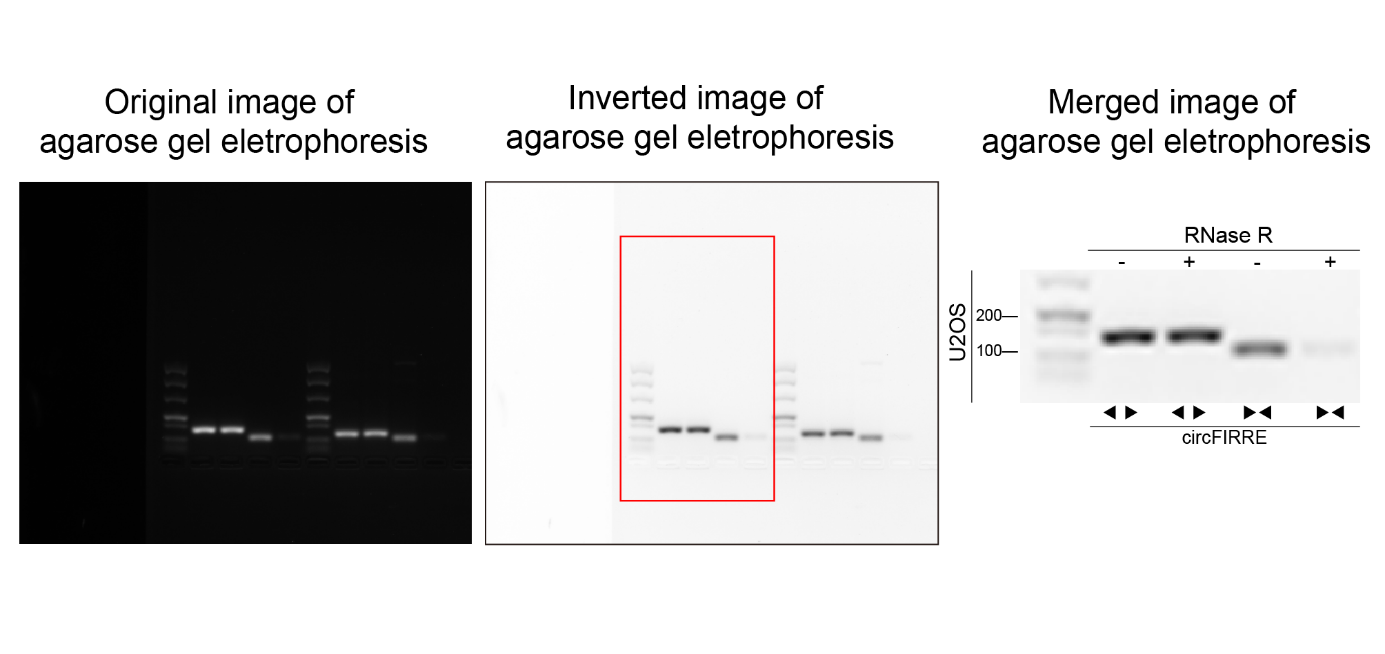
**

**Figure 1N. Agarose gel electrophoresis analysis of circFIRRE and linear FIRRE in U2OS cells after RNase R treatment. Red frame represents the component of merged image.**

**
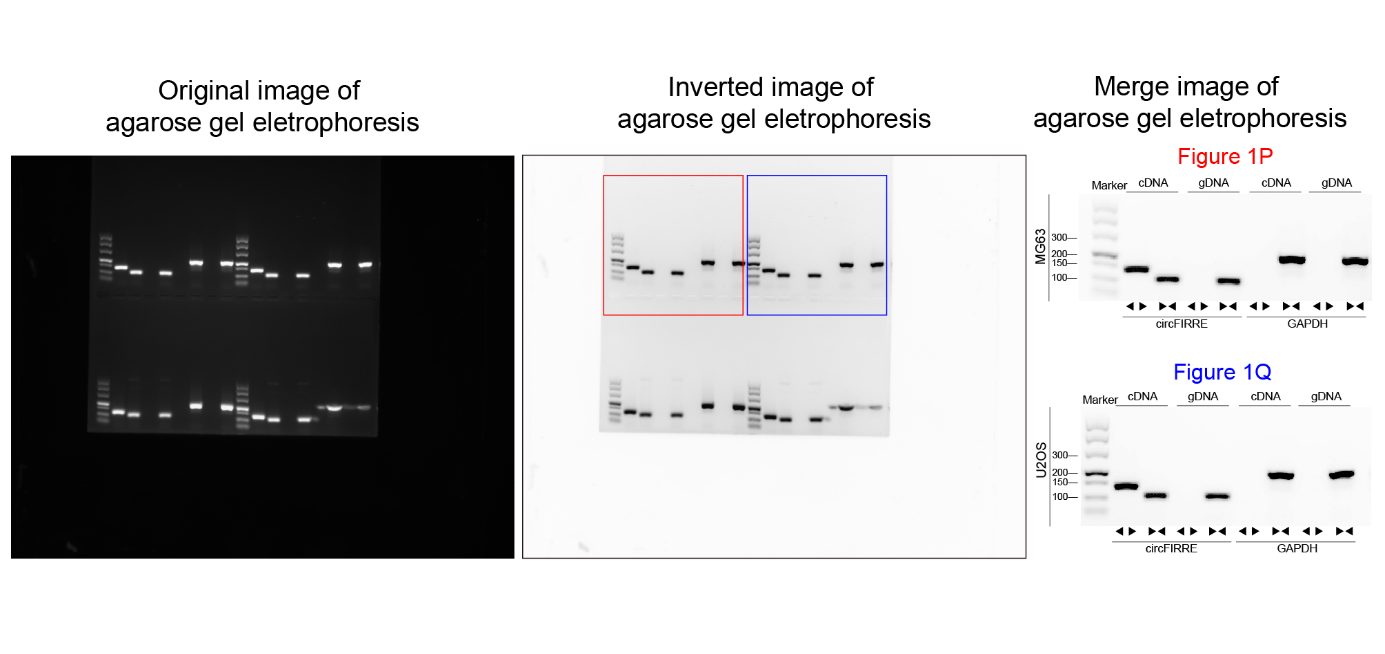
**

**Figure 1P-Q. Agarose gel electrophoresis analysis of circFIRRE and linear FIRRE from cDNA and genomic DNA components in both MG63 and U2OS cells. Red frame represents MG63 in Figure 1P; blue frame represents U2OS in Figure 1Q; GAPDH was used as an internal control.**

**
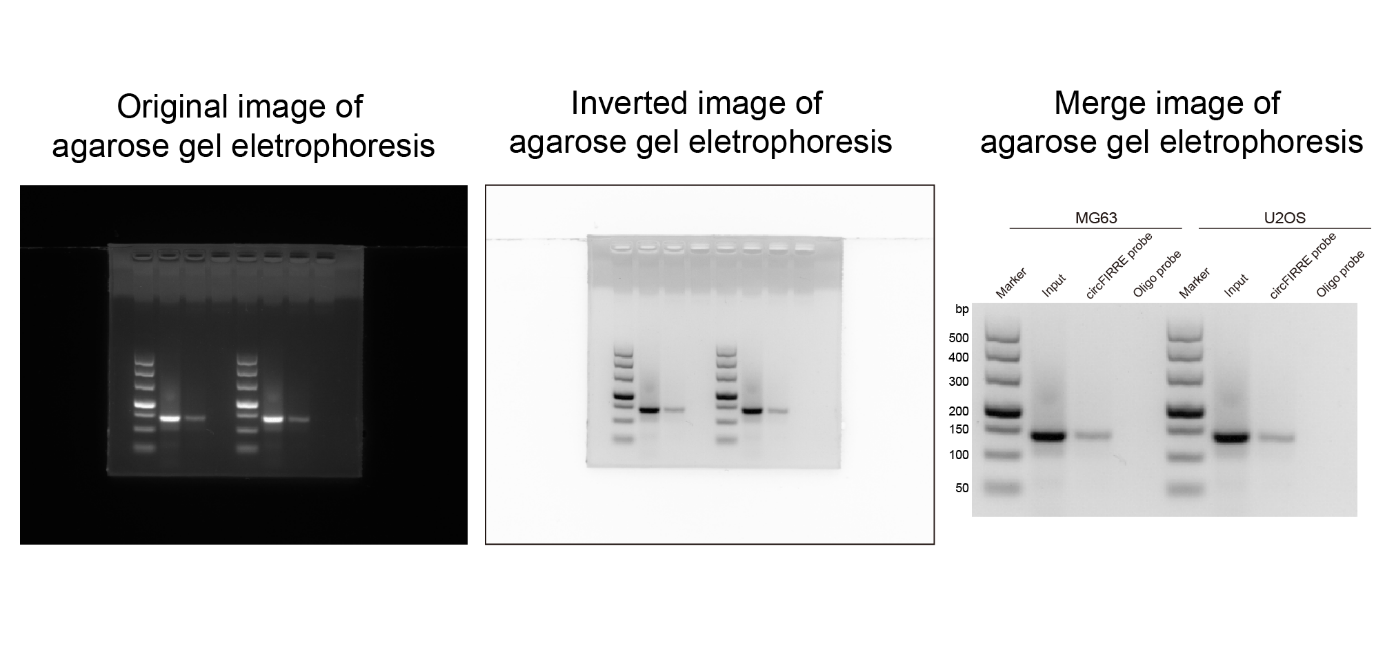
**

**Figure S8D. Agarose gel electrophoresis analysis of circFIRRE probe validation before RNA pull-down assay. Oligo probe was used as a negative control.**

**
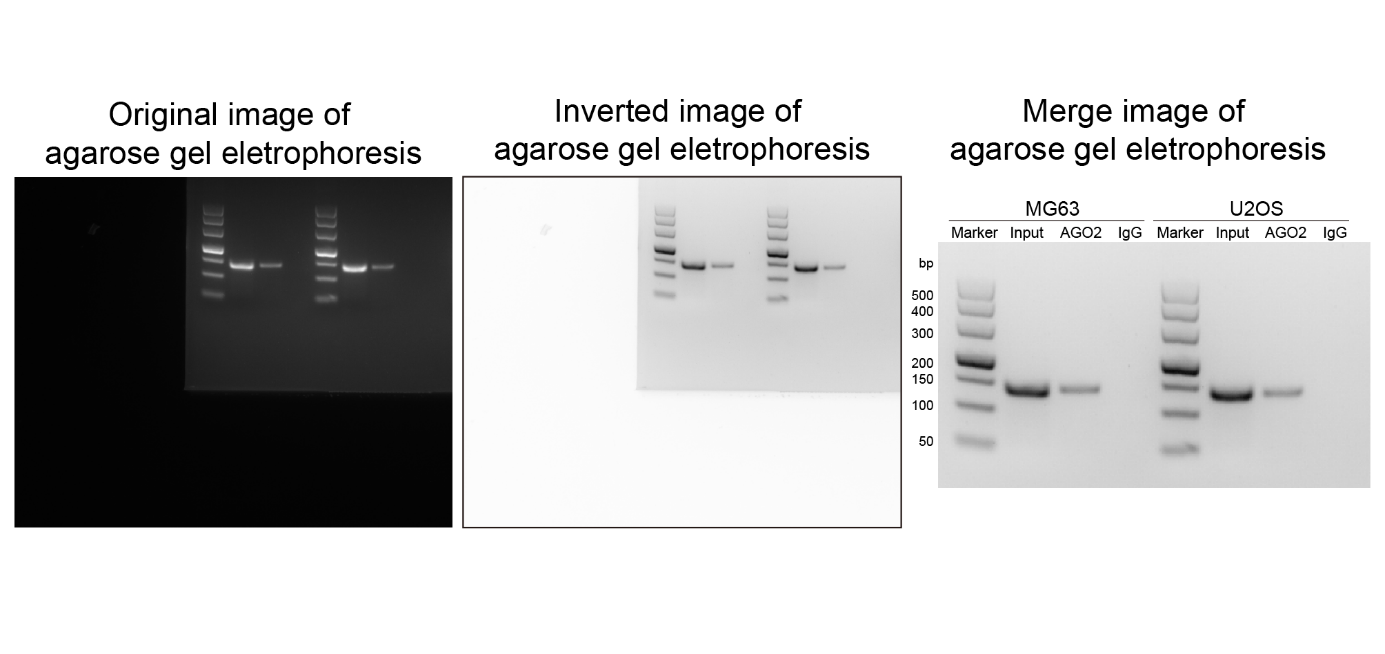
**

**Figure 6C. Agarose gel electrophoresis analysis of circFIRRE enrichment after AGO2 immunoprecipitation. IgG was used as a negative control.**
