# Supplementary material for: Circular RNA circFIRRE drives osteosarcoma progression and metastasis through tumorigenic-angiogenic coupling
Source: Research Square preprint supplement (doi:10.21203/rs.3.rs-1610775/v1), 2022-05-04
Supplement: Supplementary file 2 [file e6170eeb1e5ad02688c09748.docx]

**Circular RNA circFIRRE drives** **osteosarcoma progression and metastasis through** **tumorigenic-angiogenic coupling**

***Additional file 1***

***Supplementary*** ***materials and methods***

Lingfeng Yu, Hao Zhu, Zhen Wang, Jianhao Huang, Yan Zhu, Gentao Fan, Yicun Wang, Guangxin Zhou*

Table of contents

Supplementary materials and method----------------------------------------------------------2

Primers, probes, siRNAs and shRNAs -------------------------------------------------------13

**Supplementary materials and methods**

**RNA-sequencing**

High throughput RNA-sequencing was performed on an Illumina HiSeq 4000 sequencing system (Illumina, San Diego, CA, USA) to generate 150 bp paired-end reads.

**Cell lines and cultures**

HEK-293 T cells (ATCC: CRL-1573), and human OS cell lines, including MG63 (ATCC: CRL-1427TM), U2OS (ATCC: HTB-96TM), HOS (ATCC: CRL-1543), SJSA-1 (ATCC: CRL-2098), 143B (ATCC: CRL-8303) and human osteoblast hFOB1.19 cells (ATCC: CRL-11372) were purchased from the ATCC (Manassas, VA, USA). Mycoplasma infection was ruled out in all cell lines using the Venor GeM Mycoplasma Detection Kit (Minerva Biolabs, Berlin, Germany). HOS, 143B, MG63 cells were maintained in Eagle's Minimum Essential Medium (EMEM) supplemented with 10% fetal bovine serum (Gibco, Grand Island, NY, USA). U2OS cells were maintained in McCoy's 5a Modified Medium supplemented with 10% fetal bovine serum. SJSA-1 cells were maintained in RPMI-1640 Medium supplemented with 10% fetal bovine serum. hFOB1.19 cells were maintained in Dulbecco’s modified Eagle’s medium/Nutrient Mixture F-12 (DMEM/F-12) supplemented with 0.3 mg/mlG418 (Invitrogen, Carlsbad, CA, USA) and 10% fetal bovine serum. hFOB1.19 cells were incubated at 5% CO2 at 34 °C, remaining cells were cultured at 5% CO2 at 37 °C.

**Plasmids, siRNAs, transient transfection and stable infection**

circFIRRE sequence was amplified via specific primers and reassembles into a GM-7183 (PGMLV-circRNA_Mini-GFP-Puro) overexpressed vector via restriction enzyme sites Bsu15I and HpaI. For circFIRRE knockdown, three pairs of siRNAs targeting the back-spliced junction site were designed, the sequence were listed in **Supporing Information: Table S1**. Both overexpression vector and siRNAs were purchased from Genomeditech (Shanghai, China). The transient transfection of plasmids and siRNAs was conducted using Lipofectamine 3000 (Invitrogen, Carlsbad, CA, USA) in Opti-MEM.

For stable infection, lentivirus-sh-circFIRRE and lentivirus-miRNA sponges were synthesized by GeneChem (Shanghai, China) using the GV344 vector (hU6‐MCS‐Ubiquitin‐firelfy_Luciferase-IRES‐puromycin). The scrambled GV344 vector (TTCTCCGAACGTGTCACGT) was applied for negative control. Lentiviruses were employed to infect cells in appropriate virus titer, complying with the manufacturer’s instructions. 36 hours after lentiviruses infection, the cells were screened in puromycin (Gibco, Grand Island, NY, USA) concentration gradient from 2μg/ml to 10μg/ml for 2 weeks, and viable cells were elected for stable cell strains.

**Quantitative reverse-transcription polymerase chain reaction (RT-qPCR) and Western blot**

Total RNA was isolated from various tissues and cell lines using TRIzol (Invitrogen, Carlsbad, CA, USA). For circRNA and mRNA analyses, HiScript II Q Select RT SuperMix and ChamQ Universal SYBR qPCR Master Mix were purchased from Vazyme (Nanjing, China), GAPDH was served as the internal reference. For miRNA detections, TaqMan miRNA probes (Applied Biosystems, CA, USA) for miR-486-3p, miR-1225-5p and U6 were applied according to the manufacturer’s instructions, in which U6 was chosen as the internal reference. Subsequently reaction and quantitative analysis was performed using a LightCycler96 System (Roche, IN, USA). The relative fold-change was analyzed by the 2-△△CT method. Primers used for RT-qPCR are listed below.

For western blot analysis, protein was extracted from ultracentrifugation following cell lysis using RIPA Lysis Buffer (Beyotime, Shanghai, China) on ice. After quantified by a Pierce BCA Protein Assay kit (Thermo Scientific, CA, USA), protein was electrophoretically separated and transferred onto polyvinylidene fluoride (PVDF) membranes (Millipore, Billerica, USA). The membranes were blocked for 15 min with Blocking Buffer for Western Blot (Beyotime, Shanghai, China) and incubated overnight at 4 ℃ with anti-LUZP1 antibody (1:1000, proteintech, USA), anti-β-actin antibody (1:1000, Cell Signaling Technology, USA). After washings, a secondary antibody (1:2000, Cell Signaling Technology, USA) was incubated for 1 hour followed by another washes. Membranes were incubated in Dura ECL kit (Fudebio, Hangzhou, China) and visualized by a chemiluminescence system (Tanon, Shanghai, China).

**Ribonuclease R (RNase R) assay and Nucleic acid** **electrophoresis**

For RNase R assay, total RNA was incubated for 15 min at 37 ℃ with or without 3 U/μg RNase R (Geneseed, Guangzhou, China). The specific divergent primers for circFIRRE were applied for amplification after RNase R treatment.

For nucleic acid electrophoresis, amplified products from either cDNA or gDNA were separated in 2% agarose gel at 120 V for 30 min, and examined in a gel imaging system (Tanon, Shanghai, China).

**Actinomycin D assay**

OS cells were equally seeded in 5 wells in 6-well cell culture plates (5 × 104 cells per well). The second day, actinomycin D (5 μg/ml, Leagene, Beijing, China) was spectively added for different time gradients (0, 4, 8, 12, 24 h). The total RNA was extracted from cells in different point in times, and the expression level of circFIRRE and linear FIRRE were analyzed by RT-qPCR and normalized to the control group (0 h group).

**Cell Counting Kit (CCK)-8 assay**

For CCK8 assay, cells were equally seeded in 96-well cell culture plates (3 × 103 cells per well). At different point of time (0, 24, 48, 72 h and 96 h), 100 μL complete medium containing 10 μL CCK8 (Yeasen, Shanghai, China) was added to culture plates and incubated for 1 h. The absorbance at 450 nm was detected in a microplate reader (Thermo Scientific, CA, USA).

**5-Ethynyl-2′-deoxyuridine (EdU) assay**

EdU assay kit was purchased from RibiBio (Guangzhou, China) for EdU assays. Cells were seeded into 96-well cell culture plates overnight. In the second day, we added EdU solution (25 μM) to complete medium and incubated for recommended time. Then cells in culture plates were fixed by paraformaldehyde for 2 h and permeabilized by 0.5% TritonX-100 for 10 min. Apollo reaction solution (200 μL) and DAPI (200 μL) were added to stain EdU and nuclei respectively for 30 min. Luminescence was photographed using an Olympus IX 71 inverted fluorescence microscope (Olympus, Tokyo, Japan) to analyze cell proliferation and DNA synthesis. For image quantification, at least 5 randomly selected images were chosen from each independent experiment, and the mean level of 3 independent experiment were quantified at last.

**Wound healing assay**

We cultured cells in 6-well cell culture plates until 100% confluence. Then we scraped among the cells with 200 μl pipette tips followed by added the serum-free medium. Wound closure was photographed with an Olympus IX 71 inverted fluorescence microscope (Olympus, Tokyo, Japan) at 0 and 24 h after scratch. Diminishing area among scratch wound was analyzed, normalized to the control group (0 h group).

**Transwell migration and Matrigel invasion assays**

We coated Transwell chamber (Corning Costar, Corning, NY, USA) with or without Matrigel (BD Science, Bedford, MA, USA) for either invasion or migration verification. Briefly, medium supplemented with 20% FBS was added to the lower chambers as chemoattractant, and 5 × 104 cells for migration or 1 × 105 OS cells for invasion verification were suspended in serum-free medium and added to the upper chambers. After co-culture for 24 h, cells in the filter were fixed followed by 0.1% crystal violet staining, the migrated or invaded cells were photographed and counted using an Olympus IX 71 inverted fluorescence microscope (Olympus, Tokyo, Japan). Quantity statistics and quantified were conducted in three random visual fields. For image quantification, at least 5 randomly selected images were chosen from each independent experiment, and the mean level of 3 independent experiment were quantified at last.

**Tube formation assay**

We performed the tube formation assay according to the published literature[1]. Briefly, the Matrigel (BD Sciences, Bedford, MA, USA) were coated on 96-well culture plates and stilled standing at 37 ℃ for 30 min until gelation. Then, we seeded HUVEC cells (15 × 103 cells per well) into culture plates and incubated for 6 h followed by Calcein-AM (Yeasen, Shanghai, China) staining. Green fluorescence was photographed with an Olympus IX 71 inverted fluorescence microscope (Olympus, Tokyo, Japan) and total tube formation was analyzed by ImageJ plug-in for angiogenesis (NIH, <http://rsb.info.nih.gov/ij/>). For image quantification, at least 3 randomly selected images were chosen from each independent experiment, and the mean level of 3 independent experiment were quantified at last.

**Aortic ring assay**

We conducted aortic ring assay referring to previously report[2]. In brief, thoracic aortas were excised from mice (C57BL/6 mice, male, 8-10 weeks old) and cut into wing approximately 1 mm in width. The rings were then embedded per well of a 96-well culture plates containing 50μL of collagen type I (Millipore, Billerica, MA, USA) and transfection were performed under sterile conditions. After incubation for 1 week, the aortic rings were fixed with paraformaldehyde and specifically stained with fluorescent antibody, finally photographed using a Zeiss LSM 880 confocal microscopy (Carl Zeiss, Oberkochen, Germany). The microvessel area was quantified by TRI2 (<http://www.assembla.com/spaces/ATD_TRI/wiki>).

**Chick embryo chorioallantoic membrane (CAM) assay**

We performed CAM assay based on published literature[3]. We bought fertilized sterile eggs from Boehringer Ingelheim (Beijing, China) and cut a square window into shell after 48 h incubation. After sealing the windows, eggs were incubated at 37 ℃ for another 6 days. Until 8 day of incubation, we opened the windows and placed sterilized gelatin sponge containing transfection reagents onto the CAMs, assays for each group using at least 6 eggs. The eggs were incubated until day 12, the blood vessel areas on CAM were quantitatively analyzed according to published literature[4] using the ImageJ software. The branching points were analyzed by ImageJ plug-in for angiogenesis.

**Dual-luciferase reporter assay**

Reporter plasmids (Hanbio, Shanghai, China) was co-transfected with either miRNA mimics, YY1 vector or negative control (RiboBio, Guangzhou, China) in HEK-293 T cells. After 48 h incubation, firefly luciferase activity measured by Luciferase Reporter Gene Assay Kit (Beyotime, Shanghai, China) was normalized to Renilla luciferase activity for comparisons.

**RNA immunoprecipitation (RIP)**

The Ago-RIP was conducted using RNA Immunoprecipitation Kit (Geneseed, Guangzhou, China) as previously described[5]. 1 ml RIP lysis Buffer containing protease inhibitors cocktail and RNase inhibitors RIP was added to cell pellet after centrifugation. The supernatant of lysate was divided into two parts and respectively incubated with Ago2 antibody- (proteintech, USA) and IgG-magnetic bead complexes followed by uniform rotation at 4 °C for 2 h. Total RNAs were purified and extracted from bead complexes, the mRNA and circFIRRE components levels were then measured by RT-qPCR.

**Pull-down assay**

Briefly, 1 × 107 cells were harvested and lysed by pull-down lysis Buffer. Biotinylated circFIRRE or miRNAs probes ( RiboBio, Guangzhou, China) were incubated withC-1 magnetic beads (Life Technologies) to generate probe-beads complexes at 25 °C for 2 h, then probe-beads complexes were incubated with the pre-prepared supernatant of lysates to pull-down at 4 ℃ overnight. Total RNAs were eluted and extracted from probe-beads complexes for RT-qPCR.

**RNA Fluorescence in situ hybridization (FISH)**

Cy3-labeled circFIRRE probes, FAM-labeled miRNAs probes and FISH Kit were provided by RiboBio (Guangzhou, China). All operations were conducted referring to the manufacturer’s instructions. The probe signals were detected using a Zeiss LSM 880 confocal microscopy (Carl Zeiss, Oberkochen, Germany).

**Immunohistochemistry (IHC)**

The paraformaldehyde-fixed and paraffin-embedded tissues were immunostained with anti-LUZP1 antibody (1:500, proteintech, USA), anti-Ki-67 (1:50, BD Biosciences, USA), anti-E-Cadherin (1:400, Cell Signaling Technology, USA), anti-N-cadherin (1:1000, proteintech, USA), anti-Vimentin (1:2500, proteintech, USA), anti-CD31 (1:300, Servicebio, Wuhan, China), anti-VEGF (1:100, Santa Cruz Biotechnology, USA) at 4 ℃ for one night. Horseradish peroxidase (HRP)-labeled goat anti-mouse and anti-rabbit secondary antibodies (Zsgb-bio, Beijing, China) were used as appropriate. After incubation using a DAB Substrate Kit (Abcam, USA), the staining was visualized. Finally, we assessed the relative expression level via percentage of positive areas.

**In vivo experiments**

BALB/c Nude mice (male, 4 weeks old) were bred and provided from GemPharmatech (Jiangsu, China). All experiments involving animals were conducted comply with the Guide for the Care and Use of Laboratory Animals published by National Institutes of Health and approved by the Animal Ethical and Welfare Committee of Nanjing University (IACUC-2101002). All experiments strictly observed the panel’s specific guidelines in regard to the care, treatment and euthanasia of animals used in this study.

In orthotopic xenograft tumor models to verify the effect of circRNA-miRNAs axis on OS, 5 × 106 MG63 cells labeled with luminescent dye were suspended in sterile PBS followed by tibial bone marrow cavity injection (10 mice in each group) using a microliter syringe (Hamilton, Bonaduz, Switzerland). 4 weeks after injection, we intraperitoneal injected 150 mg/kg D-Luciferin firefly, sodium salt monohydrate (Yeasen, Shanghai, China) into mice and observed the tumor progression via bioluminescent in a IVIS Spectrum In Vivo Imaging System (PerkinElmer, USA), tumor induced-bone destruction was evaluated using a Hiscan XM Micro-CT (Hiscan, Suzhou, China) 5 weeks after injection.

In tail vein metastasis models to verify the effect of circRNA-miRNAs axis on OS, a total of 5 × 106 luminescence-labeled MG63 cells were suspended and injected into the mouse tail vein (10 mice in each group). 4 weeks after injection, lung metastasis was assessed by IVIS Spectrum In Vivo Imaging System (PerkinElmer, USA), and specific location and size of metastatic tumors were analyzed by micro-CT (Hiscan, Suzhou, China).

In patient-derived xenograft models for circFIRRE detection, we divided 30 mice into primary OS and lung metastasis OS groups. After obtained and amplified from a fresh active OS sample, a total of 5 × 106 patients derived primary OS cells were injected into tibial bone marrow cavity and tail vein, respectively. After 4 weeks, orthotopic lesions, pulmonary lesions and adjacent normal tissues from mice were extracted for RT-qPCR analysis.

**References**

1. Arnaoutova I, Kleinman H: **In vitro angiogenesis: endothelial cell tube formation on gelled basement membrane extract.** *Nature protocols* 2010, **5:**628-635.

2. Baker M, Robinson S, Lechertier T, Barber P, Tavora B, D'Amico G, Jones D, Vojnovic B, Hodivala-Dilke K: **Use of the mouse aortic ring assay to study angiogenesis.** *Nature protocols* 2011, **7:**89-104.

3. Ribatti D, Nico B, Vacca A, Presta M: **The gelatin sponge-chorioallantoic membrane assay.** *Nature protocols* 2006, **1:**85-91.

4. Magnaudeix A, Usseglio J, Lasgorceix M, Lalloue F, Damia C, Brie J, Pascaud-Mathieu P, Champion E: **Quantitative analysis of vascular colonisation and angio-conduction in porous silicon-substituted hydroxyapatite with various pore shapes in a chick chorioallantoic membrane (CAM) model.** *Acta Biomater* 2016, **38:**179-189.

5. Gagliardi M, Matarazzo MR: **RIP: RNA Immunoprecipitation.** *Methods Mol Biol* 2016, **1480:**73-86.

**Primers, probes, siRNAs and shRNAs used in this study**

| **List of oligonucleotides** | **Sequences （5‘-3’）** |
| --- | --- |
| **primers for RT-PCR and RT-qPCR** | |
| circFIRRE-F | GAGAGGAGATACTTTATGAGGAGACTAAGG |
| circFIRRE-R | GCAAGCCAGGTACAGTCTTGTG |
| FIRRE-F | TGTCTGTGTAACTGAGGTGCT |
| FIRRE-R | GCTTAGAAAAGGATTGTGGCAGA |
| hsa-YY1-F | GGATAACTCGGCCATGAGAA |
| hsa-YY1-R | ATAGGGCCTGTCTCCGGTAT |
| LUZP1-F | GGAATCGGGTAGGAGACACCA |
| LUZP1-R | TTCCCAGGCAGTTCAGACGGA |
| homo-GAPDH-F | GGAGCGAGATCCCTCCAAAAT |
| homo-GAPDH-R | GGCTGTTGTCATACTTCTCATGG |
|  | |
| **RNA pull-down probes** | |
| circFIRRE-1 | CCTTAGTCTCCTCATAAAGT(3biotin) |
| circFIRRE-2 | GACACCTTAGTCTCCTCATA(3biotin) |
| control | ACTCTACGCTCTCACCATCC(3biotin) |
| miR-486-3p | （5biotin)CGGGGCAGCUCAGUACAGGAU |
| miR-1225-5p | （5biotin)GUGGGUACGGCCCAGUGGGGGG |
|  | |
| **siRNAs** | |
| circFIRRE siRNA-1 | GAGAUACUUUAUGAGGAGACU |
| circFIRRE siRNA-2 | ACUUUAUGAGGAGACUAAGGU |
| circFIRRE siRNA-3 | UAUGAGGAGACUAAGGUGUCA |
| YY1 siRNA-1 | CGACGACTACATTGAACAA |
| YY1 siRNA-2 | CGGCTTCGAGGATCAGATT |
| YY1 siRNA-3 | CACCATGTGGTCCTCAGAT |
|  | |
| **shRNAs** | |
| circFIRRE shRNA-1 F | ccggGAGATACTTTATGAGGAGACT**CTCGAG**AGTCTCCTCATAAAGTATCTCtttttg |
| circFIRRE shRNA-1 R | aattcaaaaaGAGATACTTTATGAGGAGACT**CTCGAG**AGTCTCCTCATAAAGTATCTC |
| circFIRRE shRNA-2 F | ccggACTTTATGAGGAGACTAAGGT**CTCGAG**ACCTTAGTCTCCTCATAAAGttttttg |
| circFIRRE shRNA-2 R | aattcaaaaaACTTTATGAGGAGACTAAGGT**CTCGAG**AGTCTCCTCATAAAGTATCTC |
